# Supplementary material
Source: PubMed Central journal article supplement (PMC6556903)

| Method |         | CIBERSORT          |         |      | RPC                |         |      | QP                 |         |      |
|--------|---------|--------------------|---------|------|--------------------|---------|------|--------------------|---------|------|
|        |         | proportion predict |         |      | proportion predict |         |      | proportion predict |         |      |
|        |         | HCC                | control | preg | HCC                | control | preg | HCC                | control | preg |
| Truth  | HCC     | 18                 | 9       | 0    | 17                 | 10      | 0    | 14                 | 13      | 0    |
|        | control | 7                  | 25      | 0    | 7                  | 25      | 0    | 3                  | 29      | 0    |
|        | preg    | 0                  | 1       | 16   | 0                  | 1       | 16   | 0                  | 0       | 17   |

Supplementary Table S1: Classification confusion matrices based on real data using different reference-based methods. HCC: hepatocellular carcinoma patients. control: healthy, unpregnant control people. preg: healthy pregnant women. Cibersort: using tissue proportions solved from Cibersort for prediction. RPC: using tissue proportions solved from Robust Partial Correlations for prediction. QP: using tissue proportions solved from Quadratic Programming procedure for prediction. Cibersort predicted accuracy: 0.78. RPC predicted accuracy: 0.76. QP predicted accuracy: 0.79.

Supplementary Figure S1: Boxplot of classification accuracies for NMF and QP under different noise level and sample size. NMF: Non-negative matrix factorization (NMF) approach. QP: using tissue proportions solved from Quadratic Programming procedure for prediction.  $N$  represent the total sample size used in simulation. 3-fold cross validation was conducted. A, low noise level; B, medium noise level; C, high noise level.

Supplementary Figure S2: Boxplot of classification accuracies for multiple methods in simulations. QP: using tissue proportions solved from Quadratic Programming procedure for prediction. OLS: using tissue proportions directly solved from Ordinary Least Square without constraint in QP. QP high var: using a 'high-noise reference' as the reference in the QP step to solve tissue proportions, then use the solved proportions for prediction. QP random: using a 'randomly shuffled reference' as the reference in the QP step to solve tissue proportions, then use the solved proportions for prediction. A, low noise level; B, medium noise level; C, high noise level.

Supplementary Figure S3: Boxplot of classification accuracies for multiple reference-based methods in simulations. QP: using tissue proportions solved from Quadratic Programming procedure for prediction. RPC: using tissue proportions solved from Robust Partial Correlations for prediction. CBS: using tissue proportions solved from Cibersort for prediction. True prop: using true tissue proportions for prediction. A, low noise level; B, medium noise level; C, high noise level.

Supplementary Figure S4: Scatterplots of NMF estimated reference methylation levels versus true reference methylation levels in all 14 tissues in simulation. Spearman's correlation is shown in each panel.

Supplementary Figure S5: Scatterplots of NMF estimated tissue proportions versus true tissue proportions in all 14 tissues in simulation. Spearman's correlation is shown in each panel.

Supplementary Figure S6: Boxplot of real data solved tissue proportions for all 14 tissues, respectively, among 3 groups. One panel for each tissue.

Supplementary Figure S7: Scatterplots of NMF estimated reference methylation levels versus true reference methylation levels in all 14 tissues in real data from Sun K et al. PNAS 2015. Spearman's correlation is shown in each panel.

**A**

low noise level

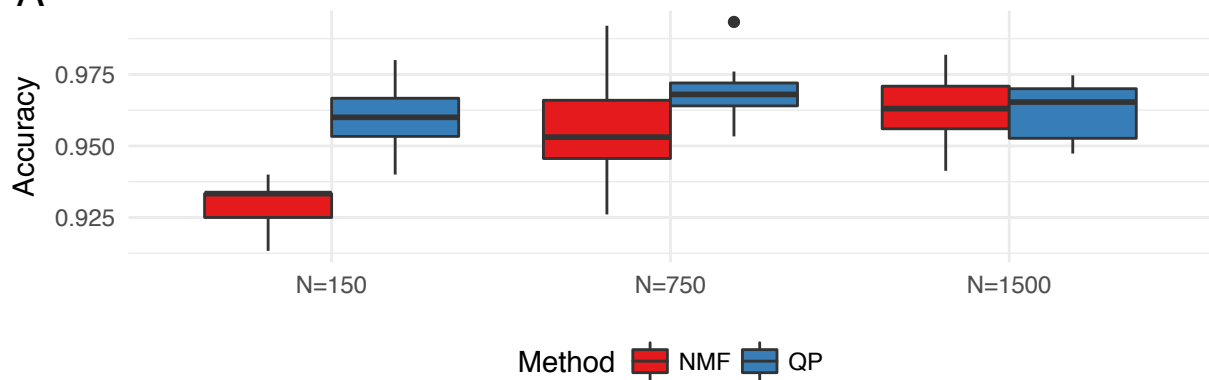**B**

medium noise level

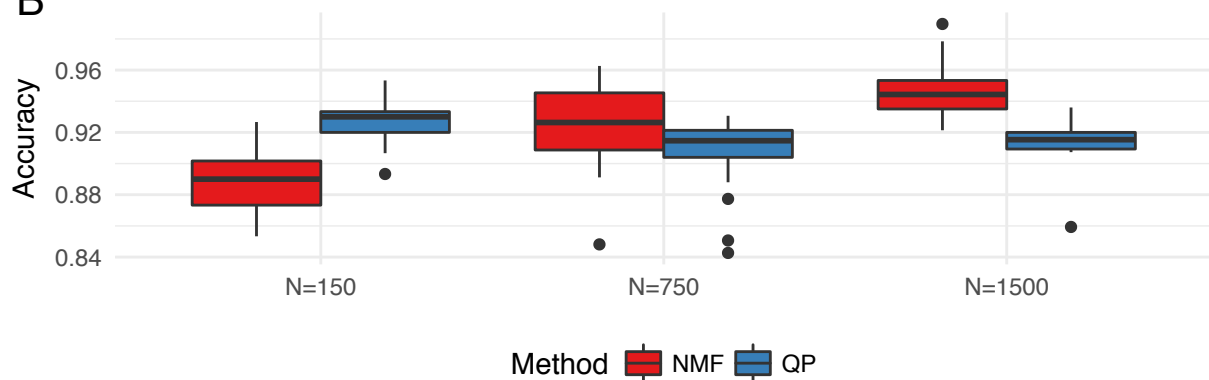**C**

high noise level

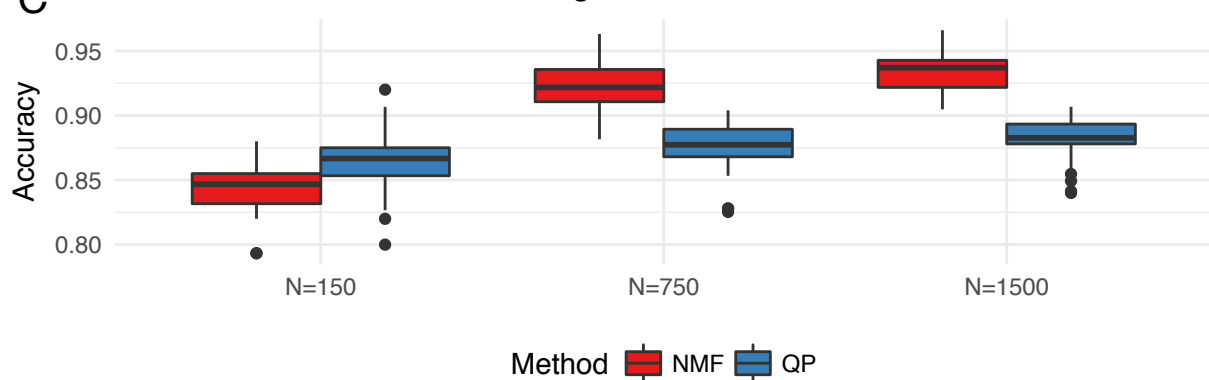

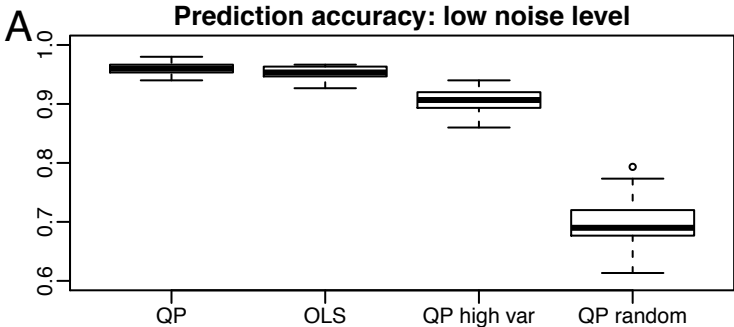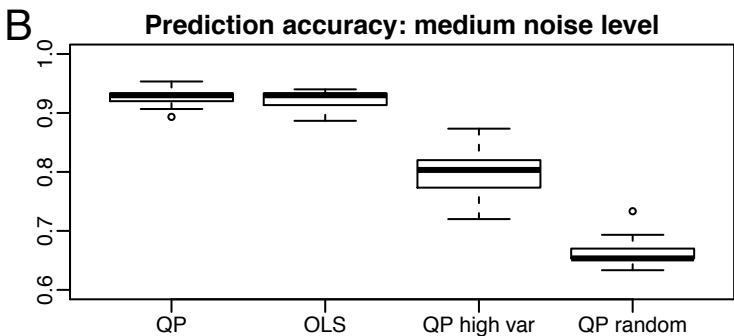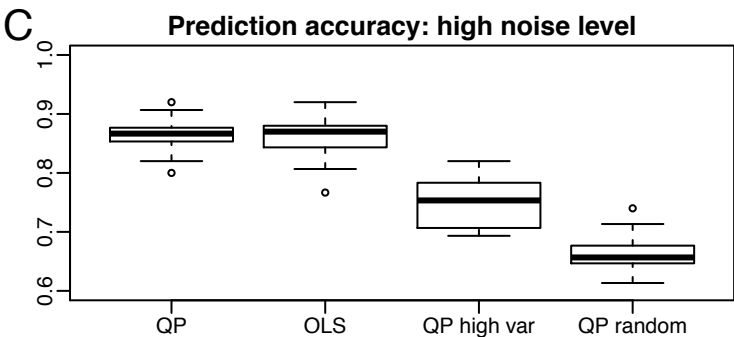

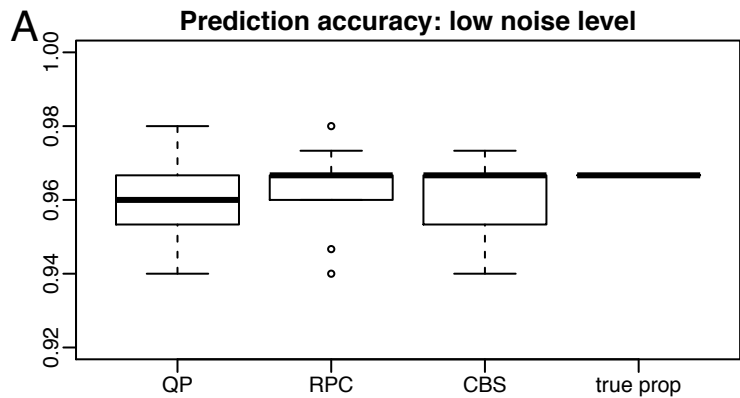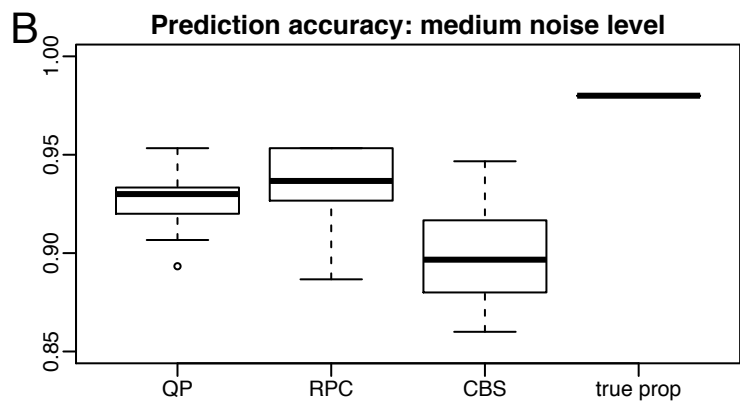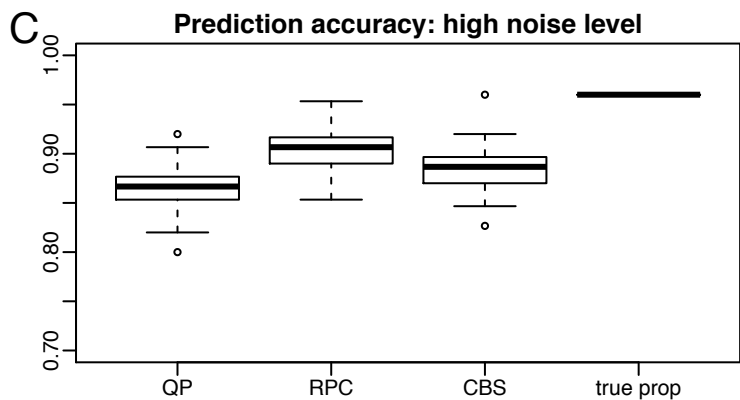

**Small intestines cor=0.84**

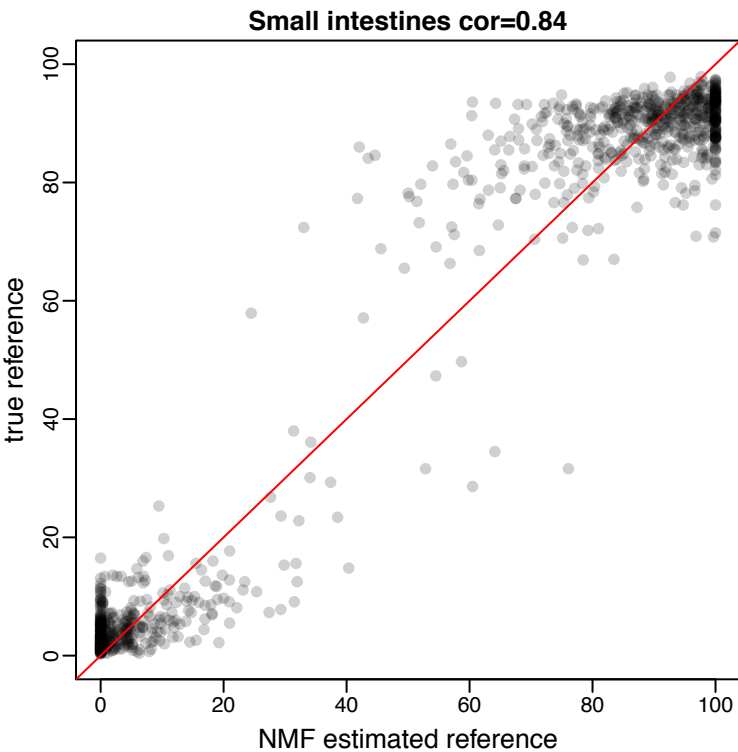

**Adipose tissues cor=0.886**

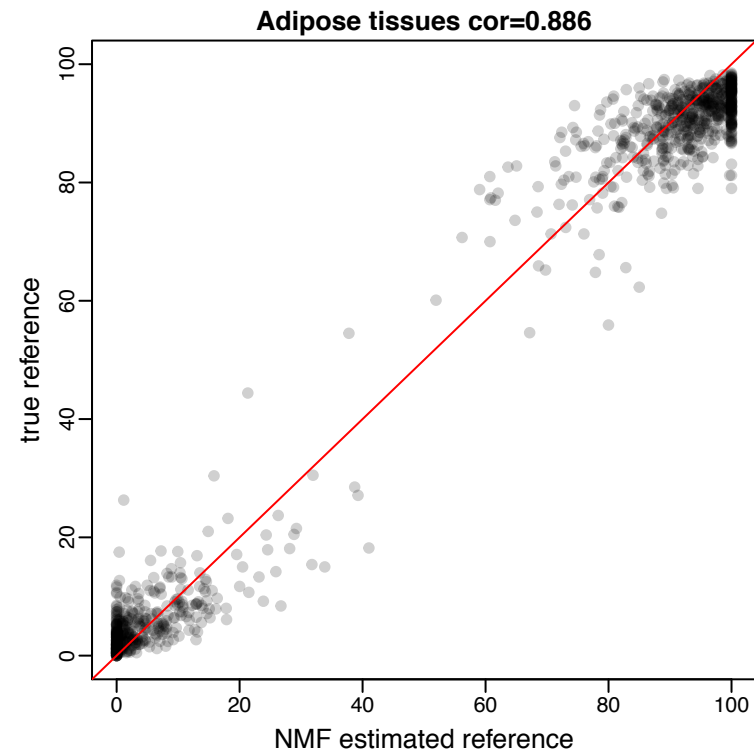

**Adrenal glands cor=0.839**

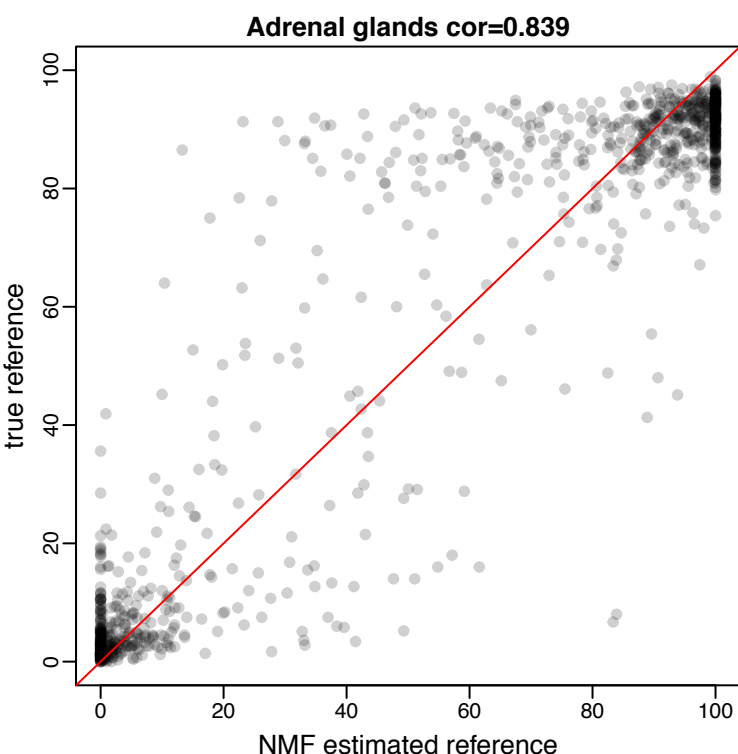

**Lungs cor=0.856**

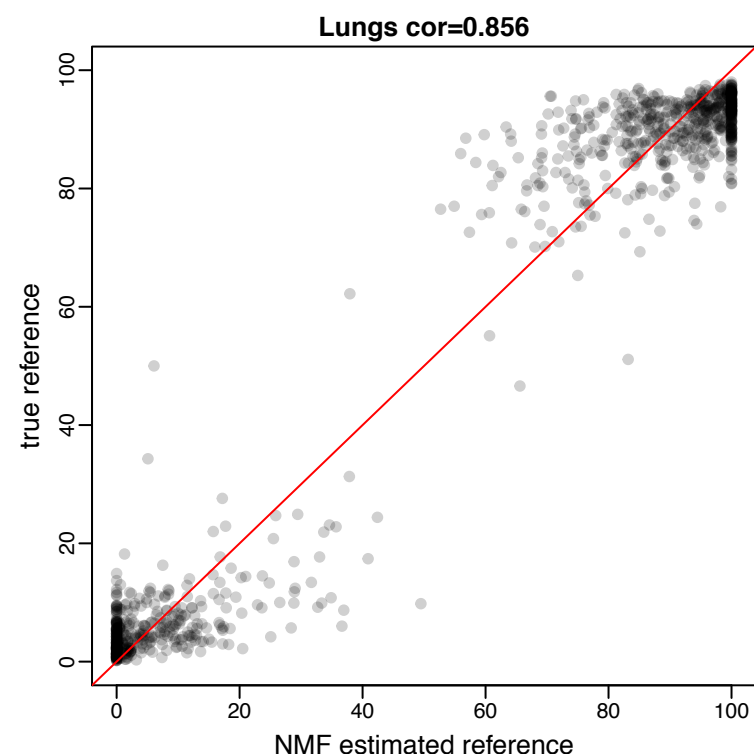

**Heart cor=0.768**

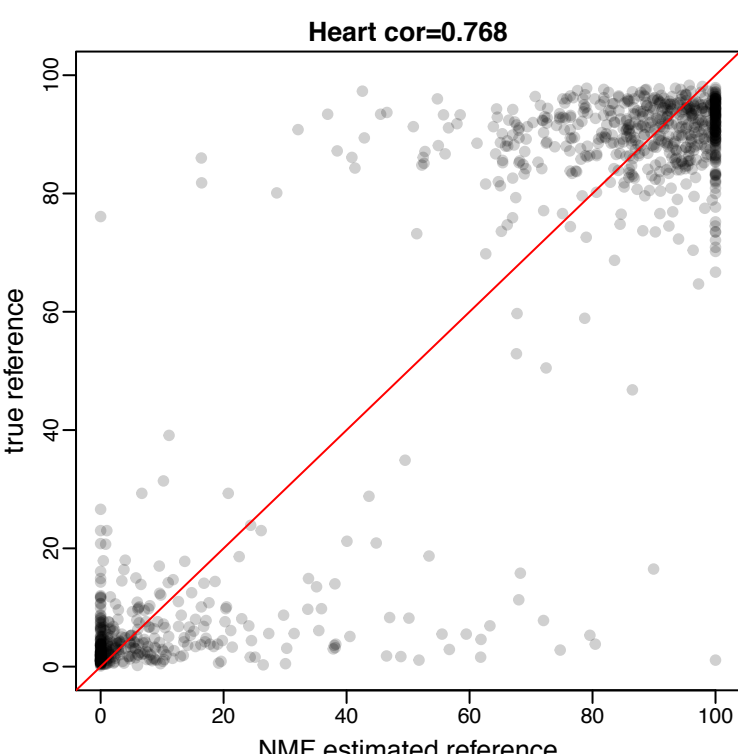

**Neutrophils cor=0.898**

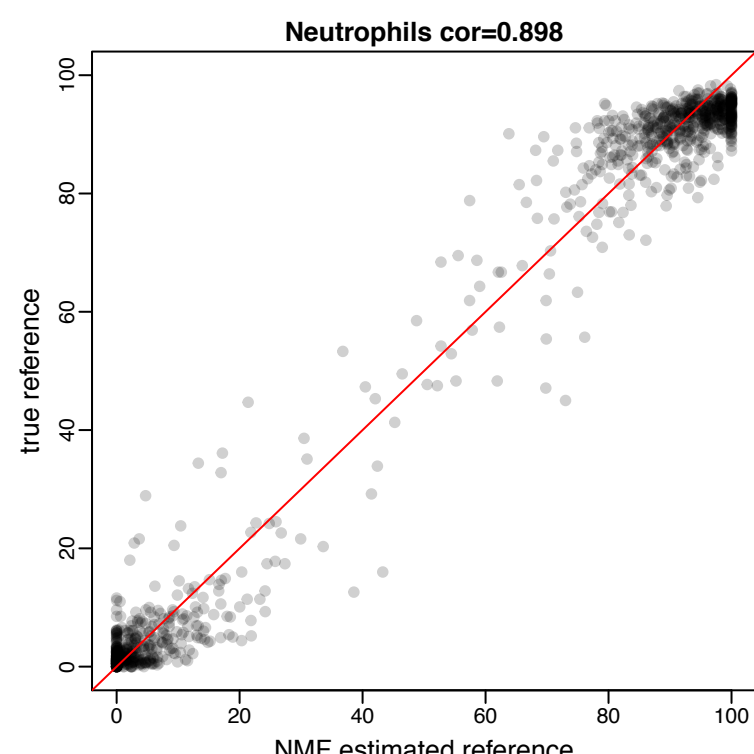

**T cells cor=0.782**

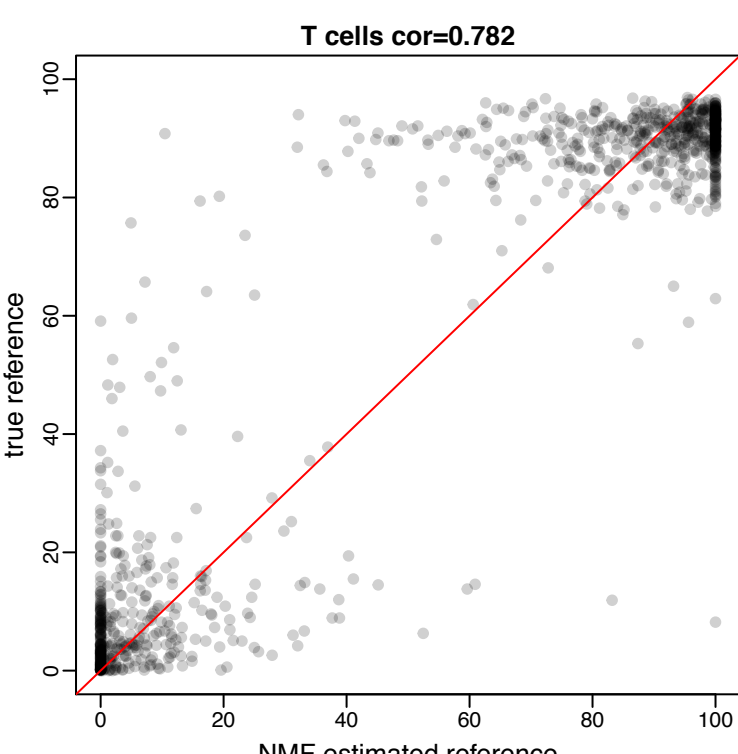

**Esophagus cor=0.789**

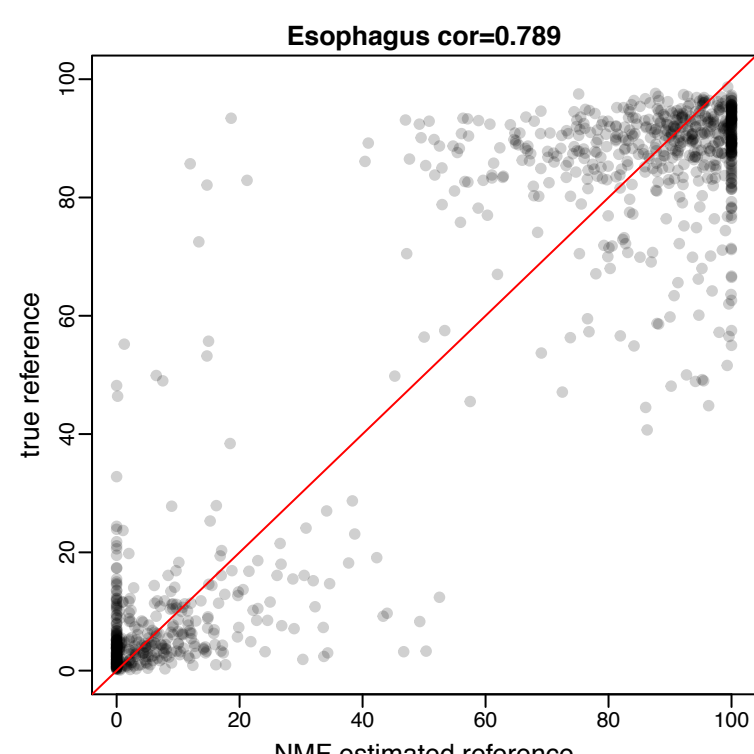

**B cells cor=0.867**

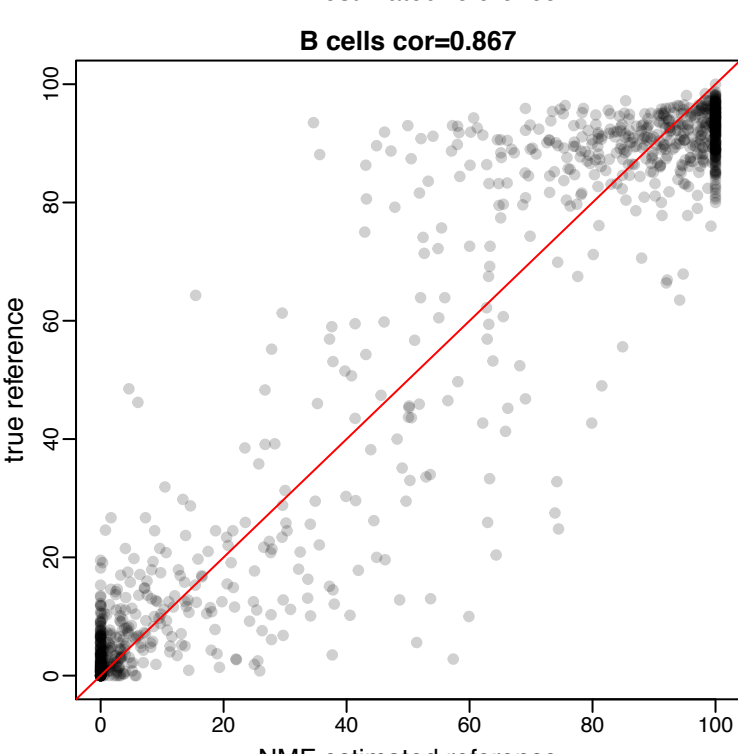

**Liver cor=0.835**

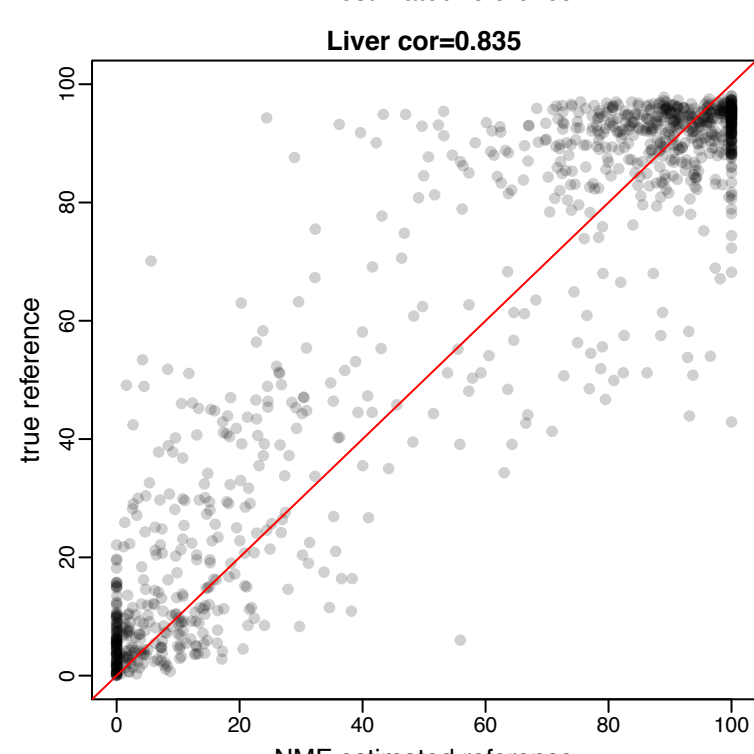

**Placenta cor=0.884**

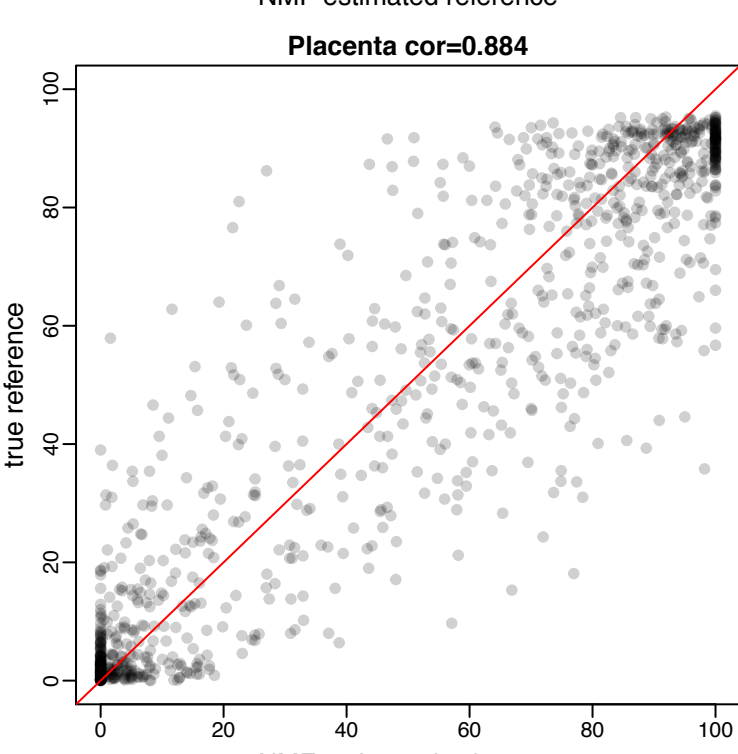

**Brain cor=0.877**

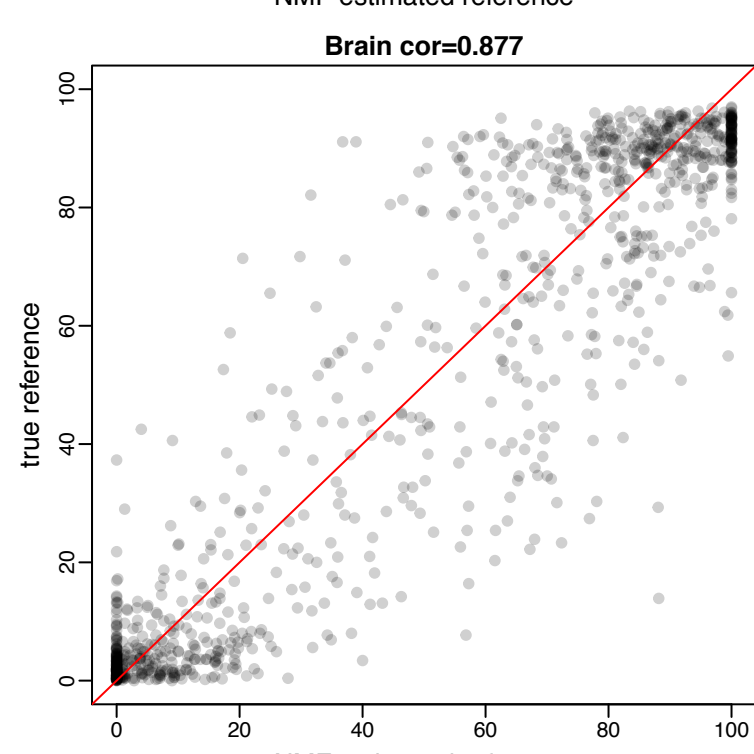

**Pancreas cor=0.845**

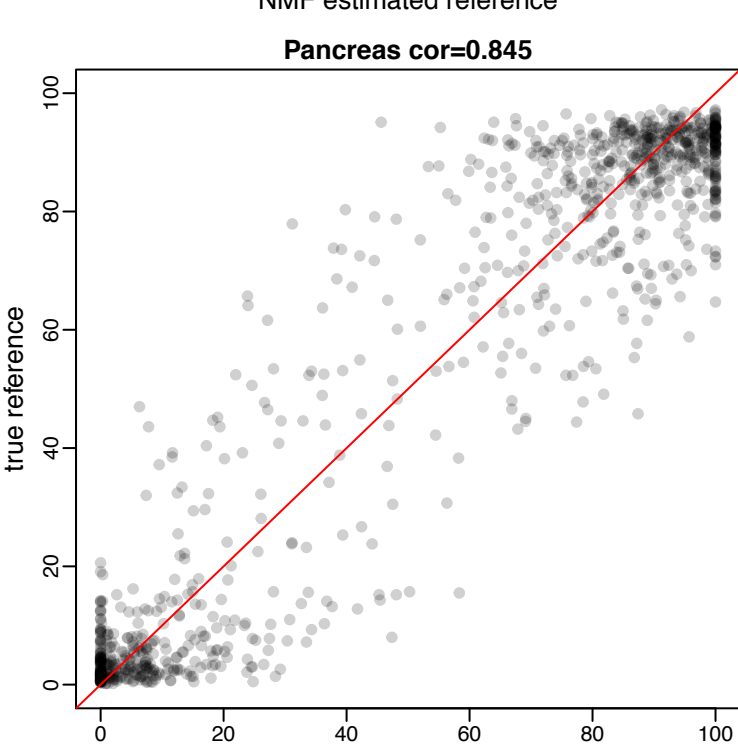

**Colon cor=0.704**

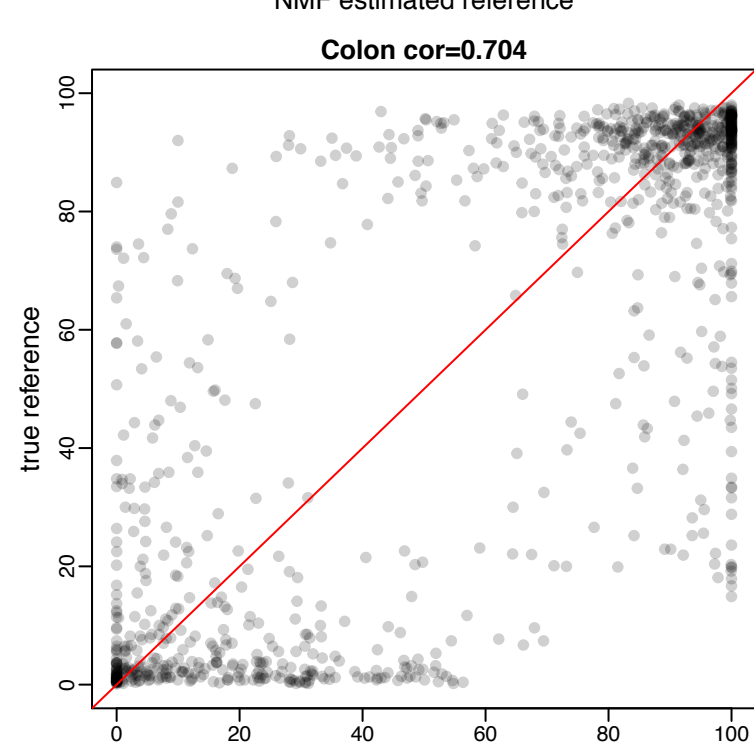

**Small intestines cor=0.345**

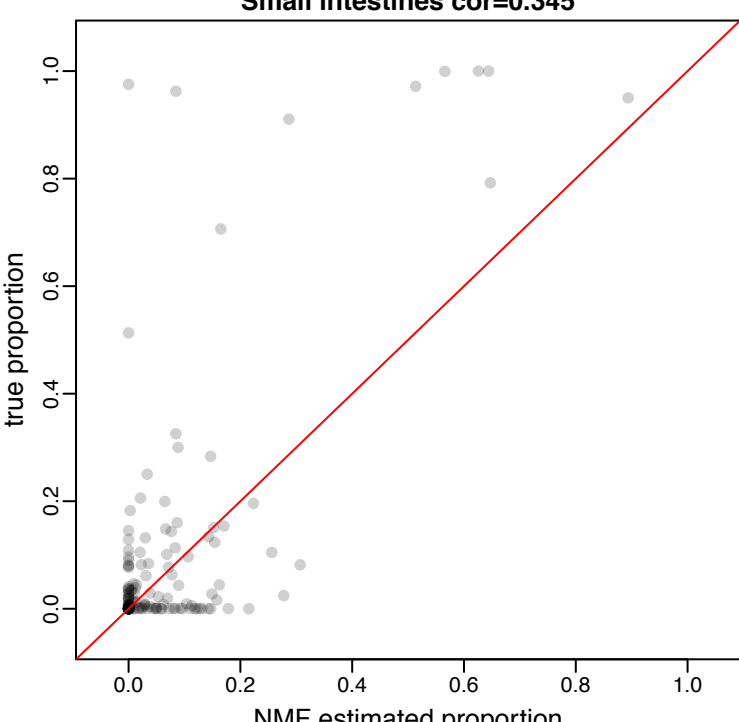

**Adipose tissues cor=0.568**

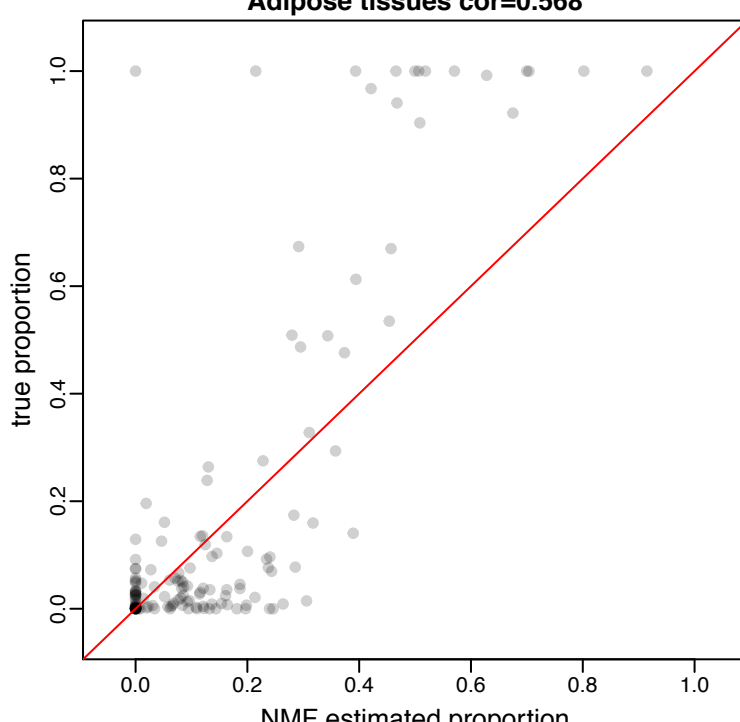

**Adrenal glands cor=0.204**

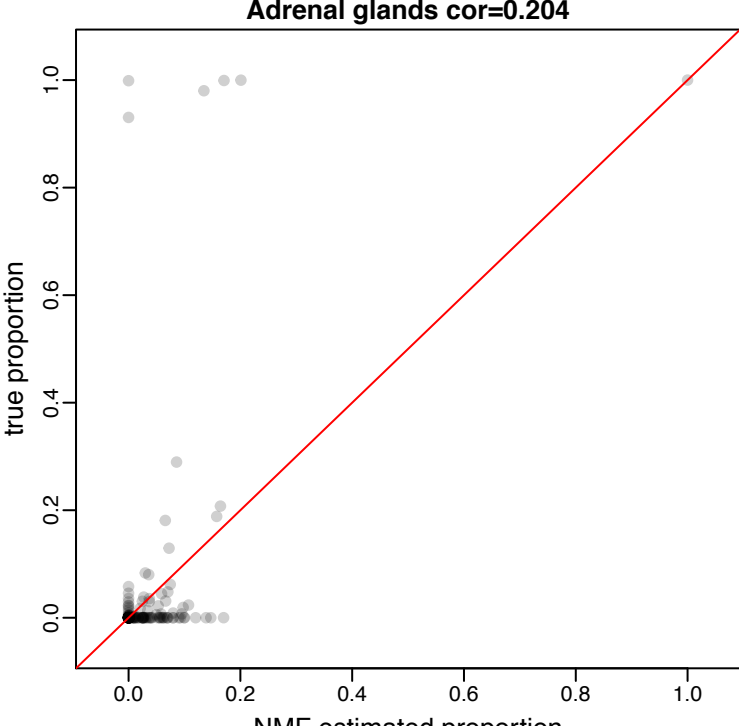

**Lungs cor=0.265**

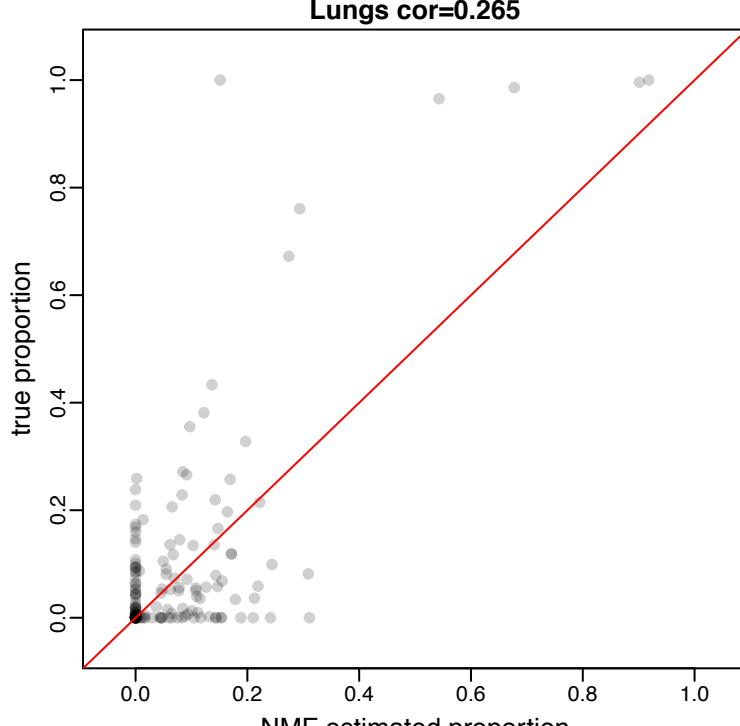

**Heart cor=0.09**

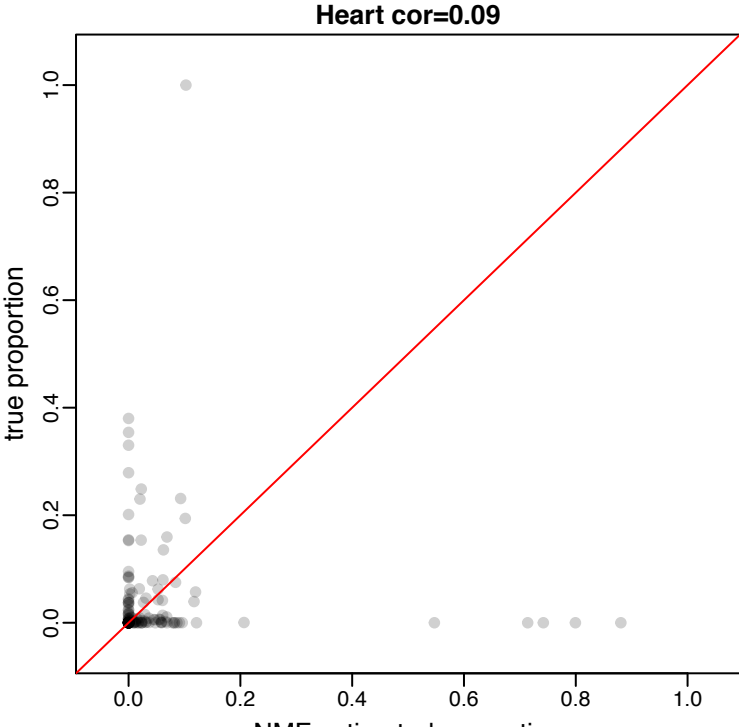

**Neutrophils cor=0.745**

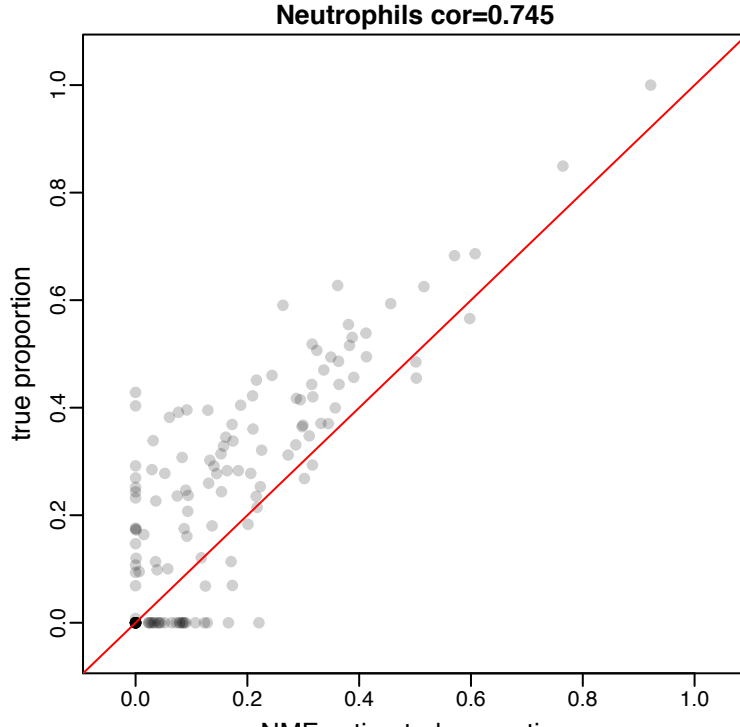

**T cells cor=0.065**

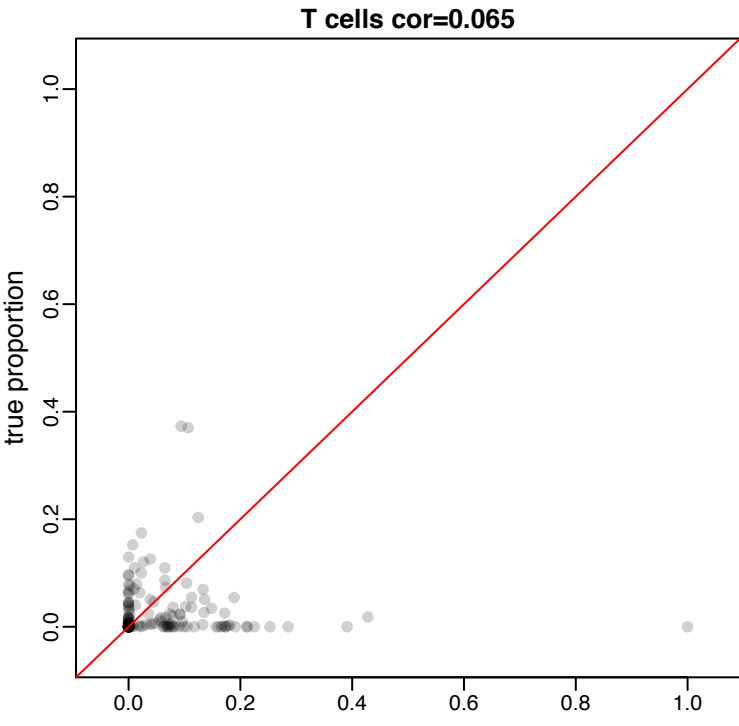

**Esophagus cor=0.1**

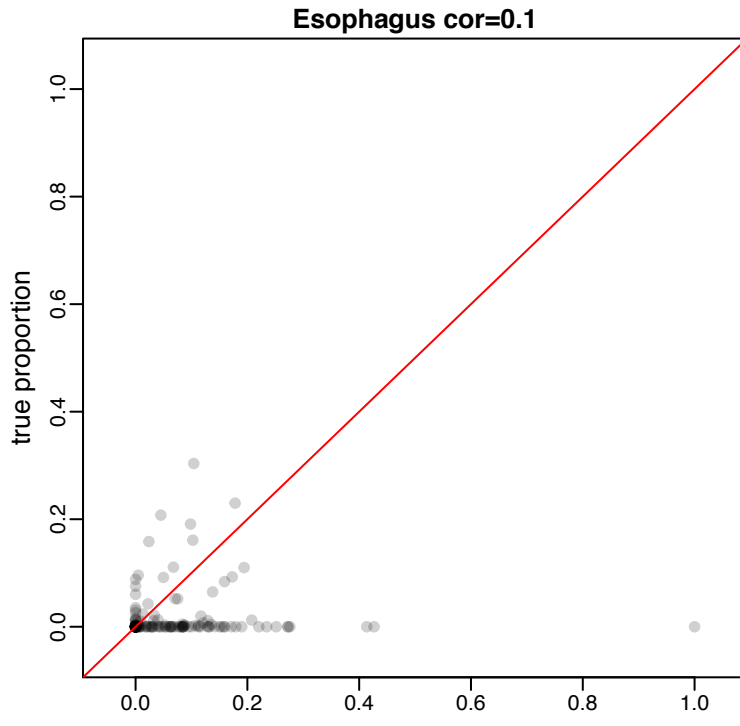

**B cells cor=0.463**

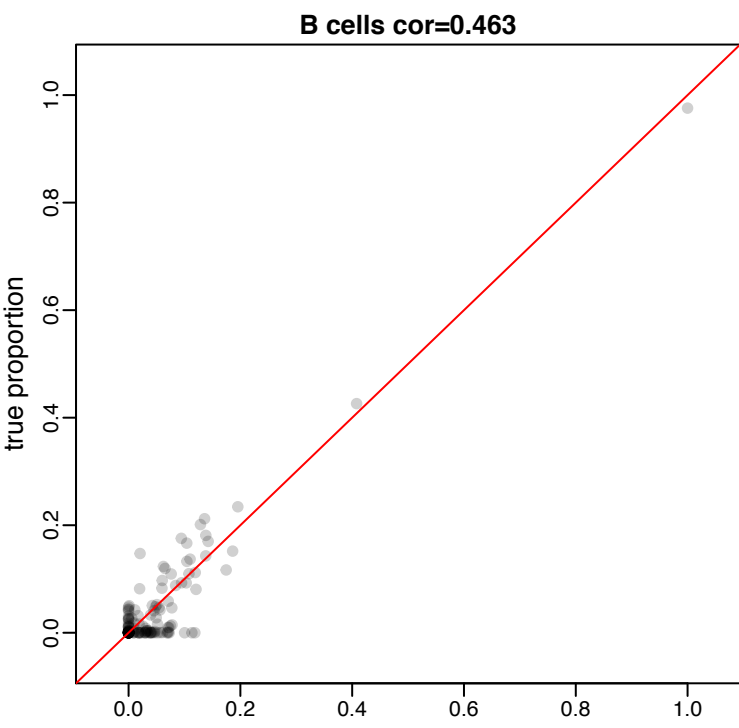

**Liver cor=0.476**

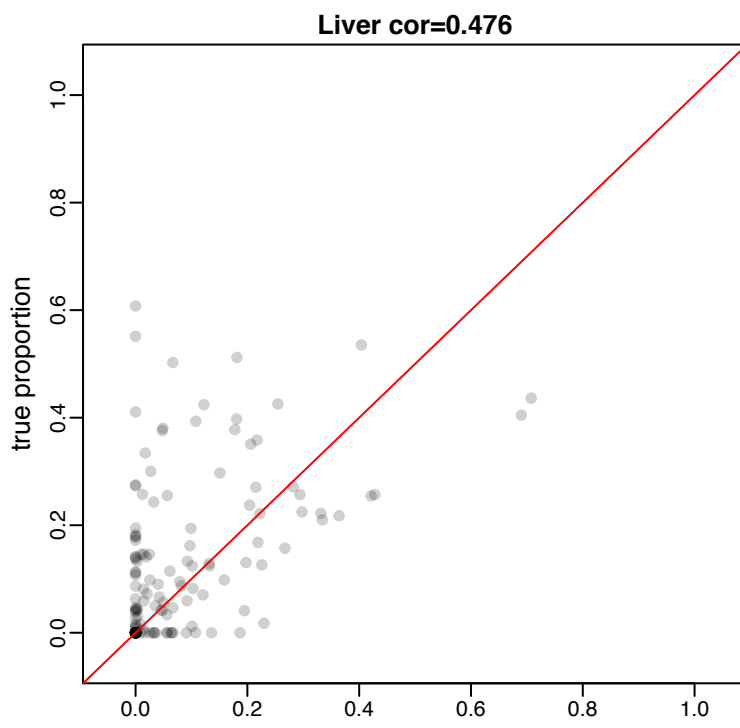

**Placenta cor=0.529**

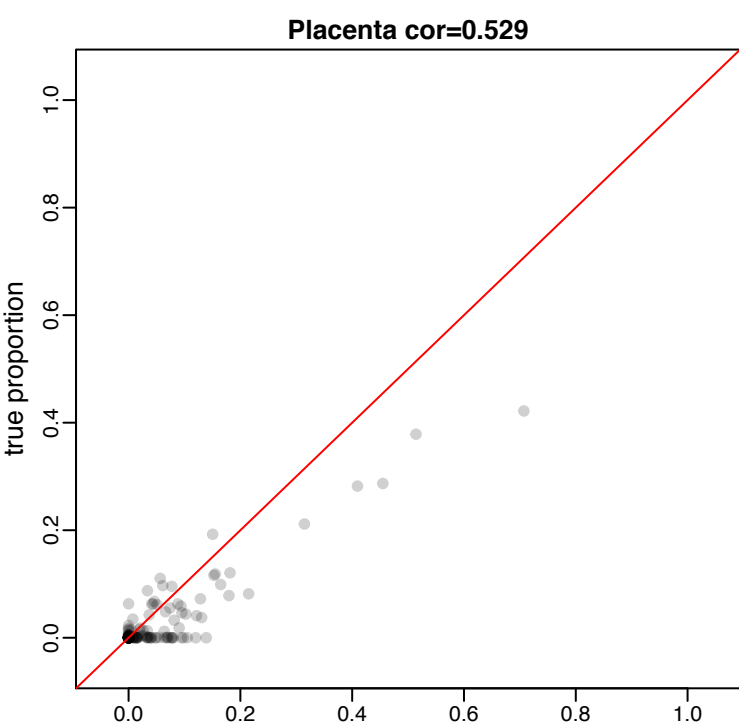

**Brain cor=0.486**

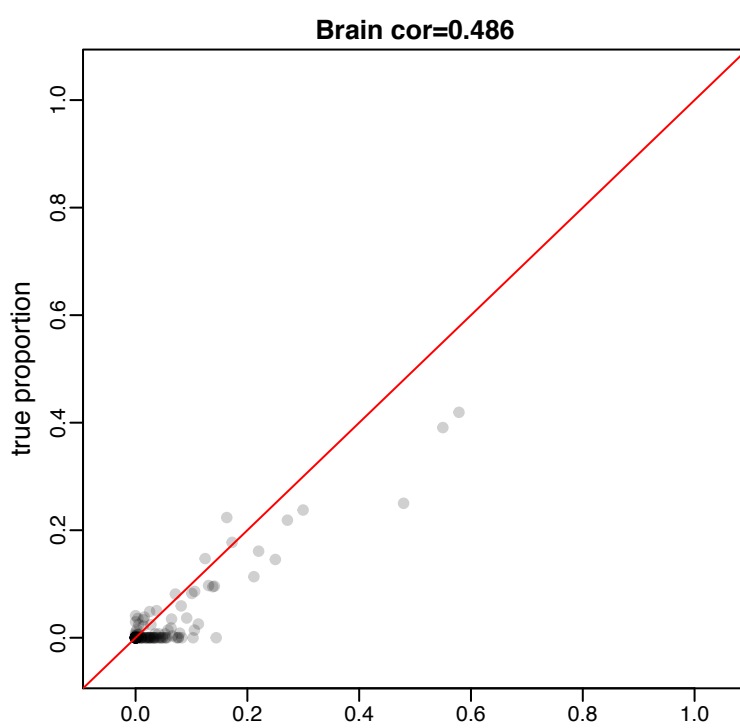

**Pancreas cor=0.42**

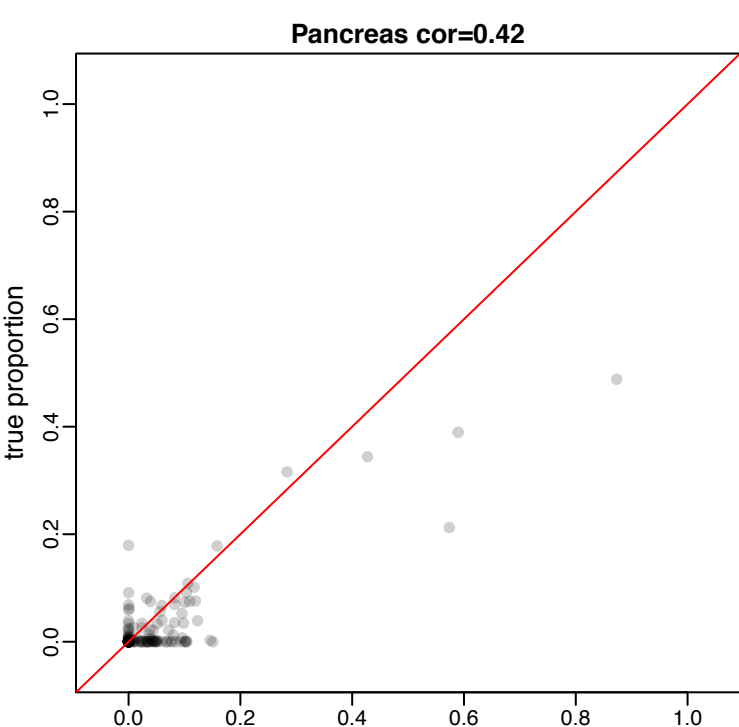

**Colon cor=0.378**

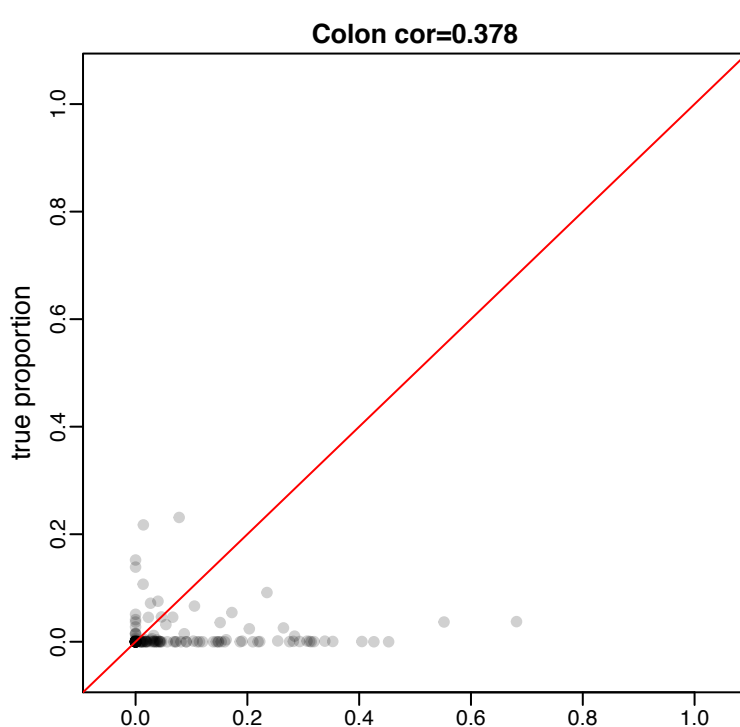

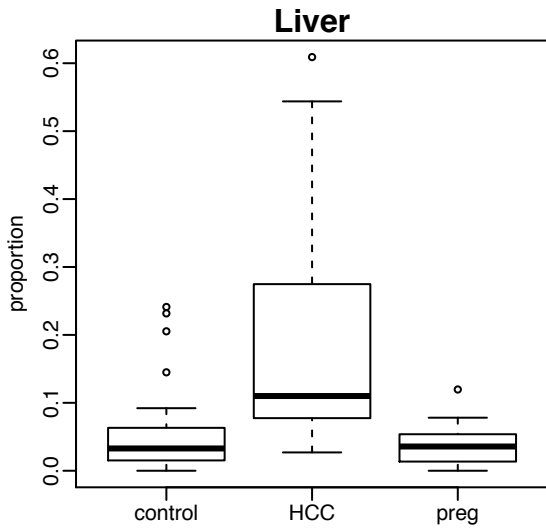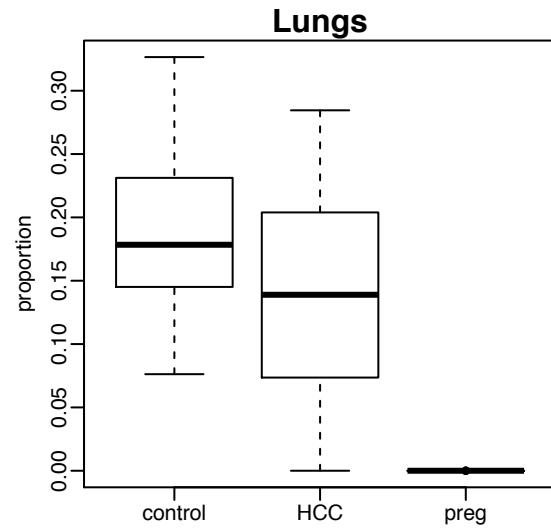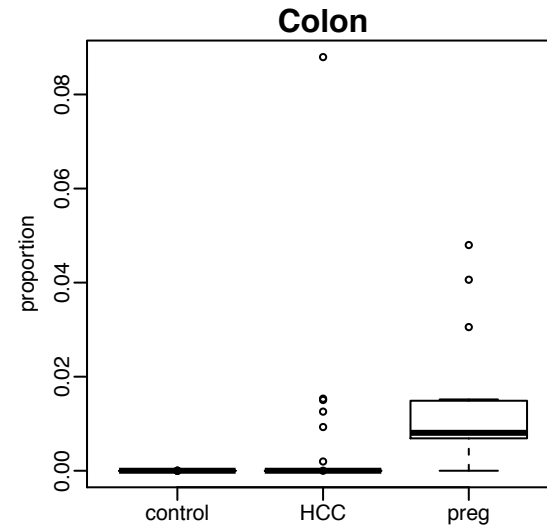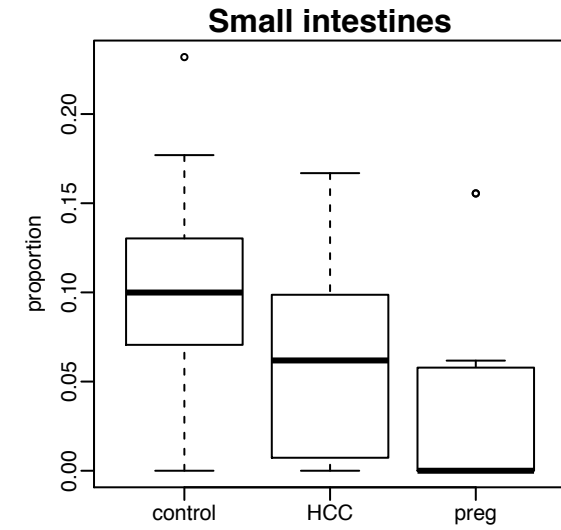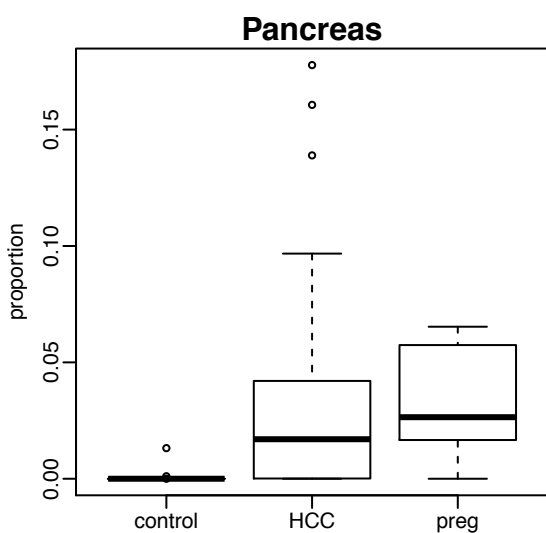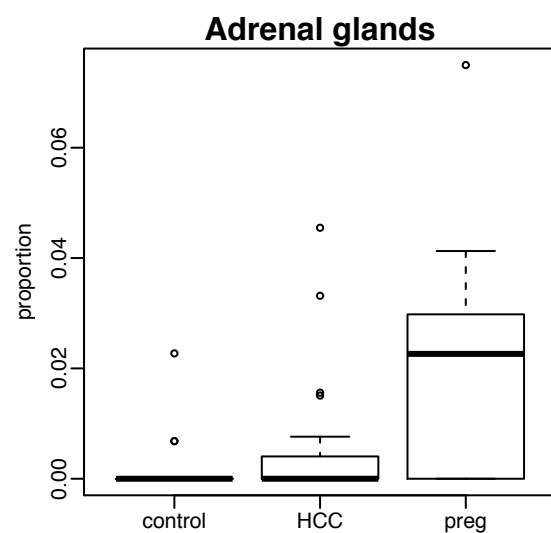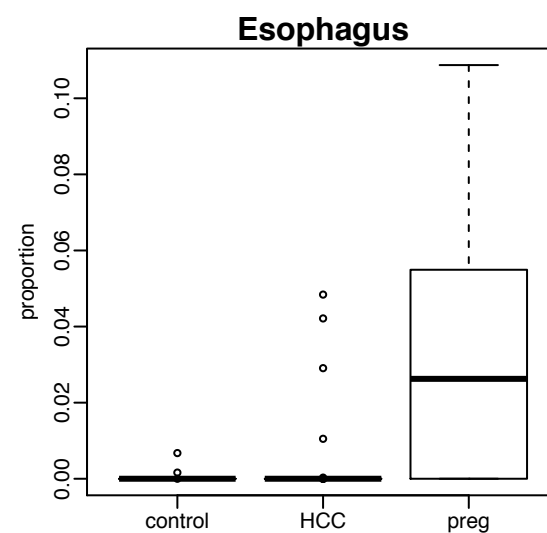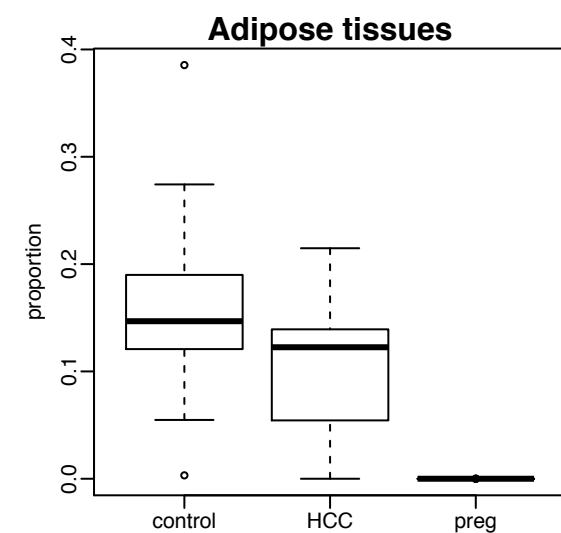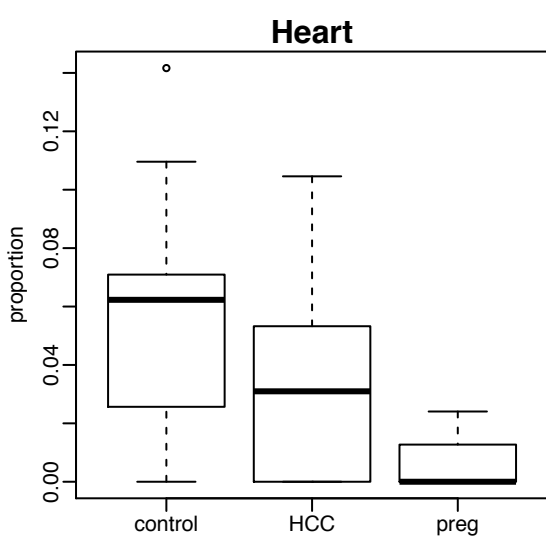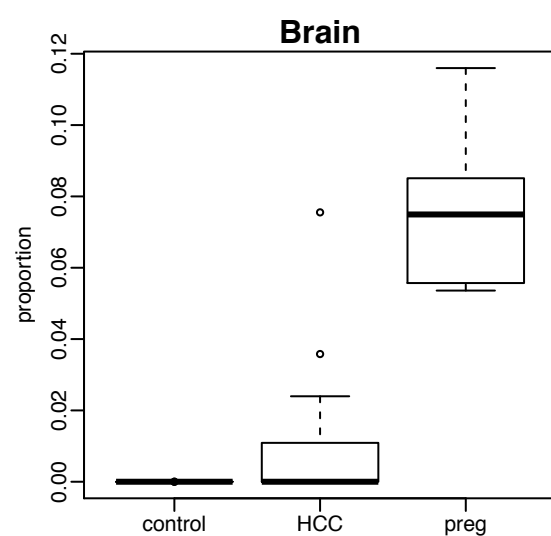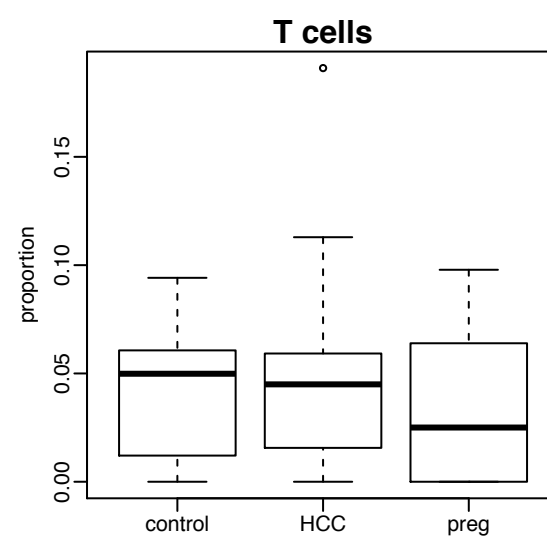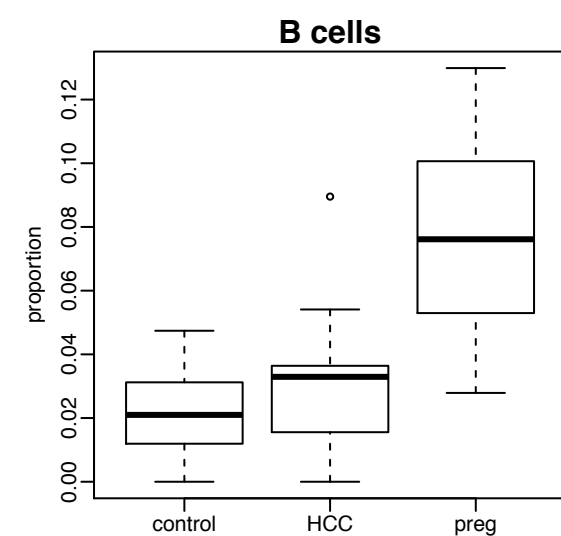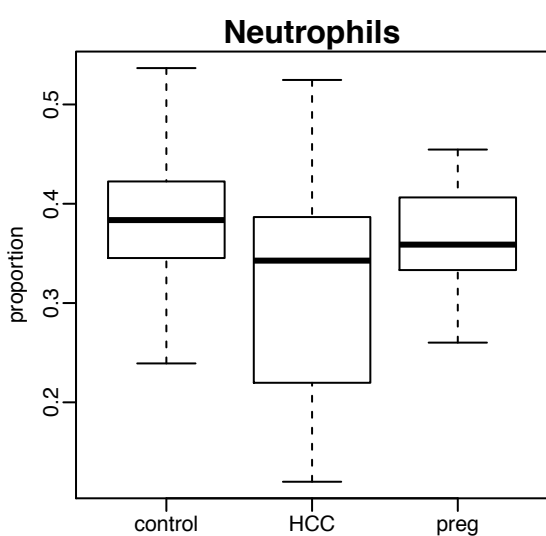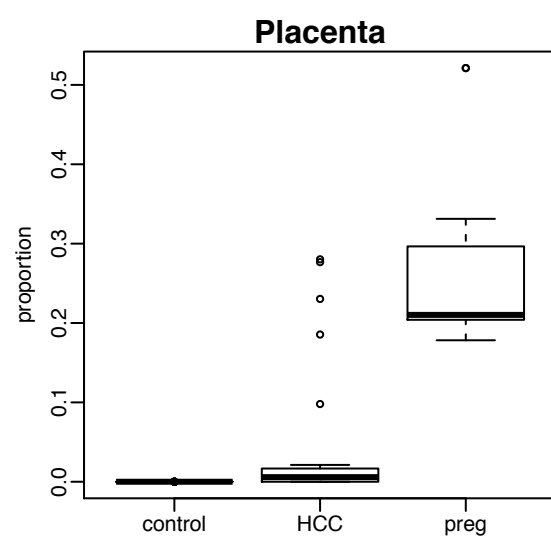



**Adipose tissues cor=0.886**

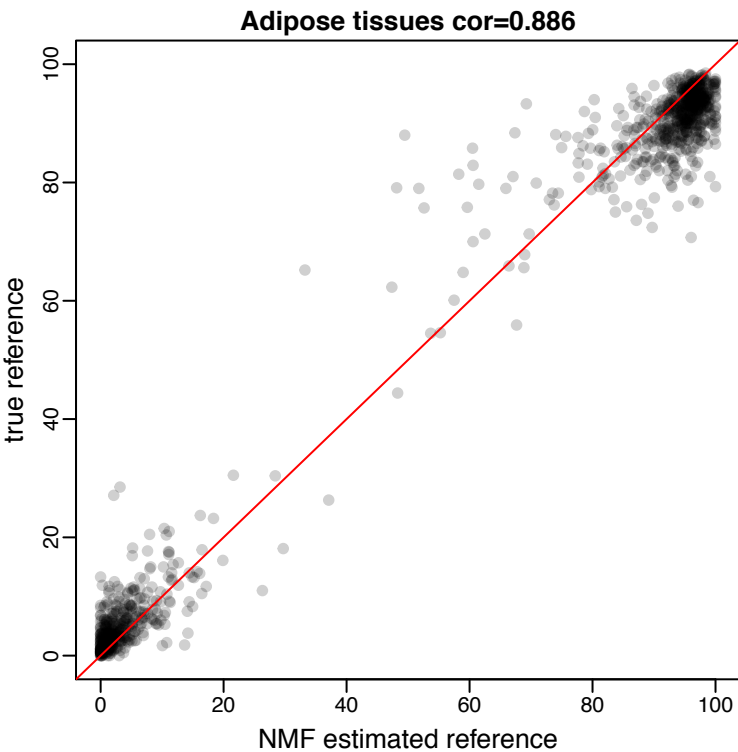

**Lungs cor=0.82**

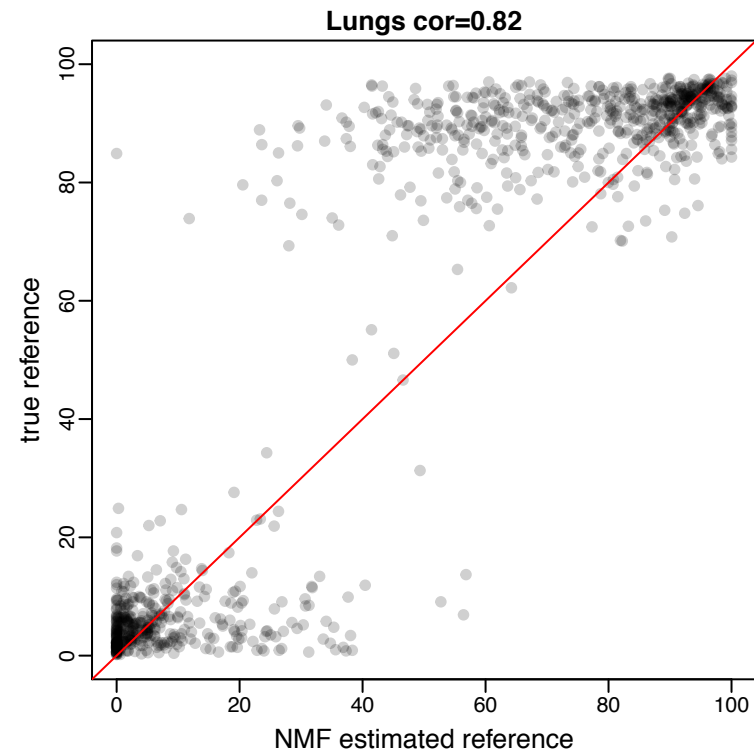

**Liver cor=0.897**

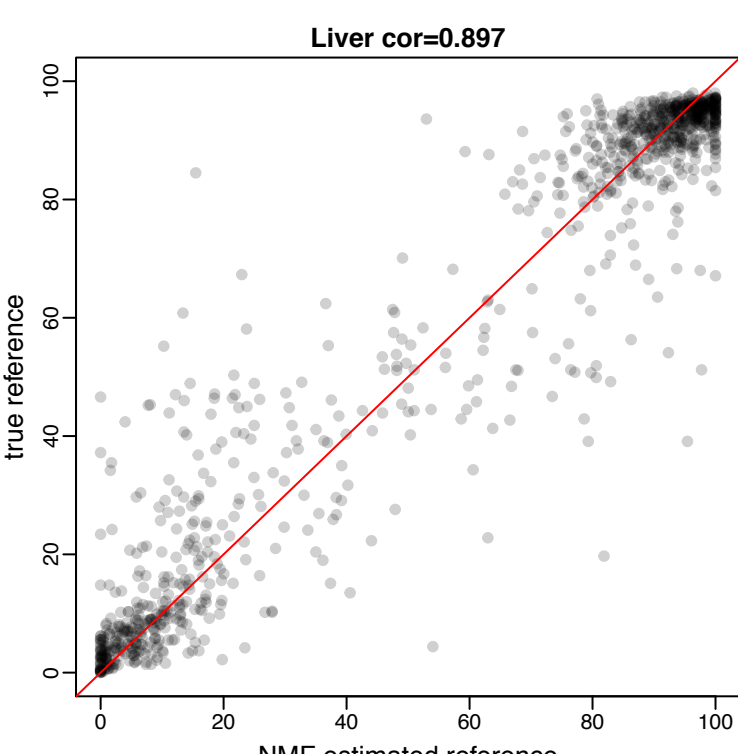

**Small intestines cor=0.779**

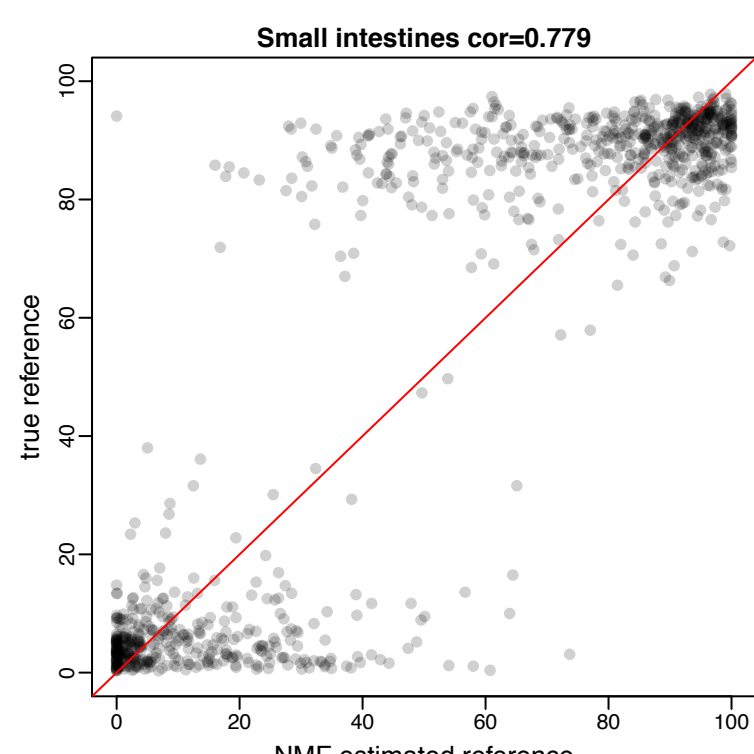

**Heart cor=0.766**

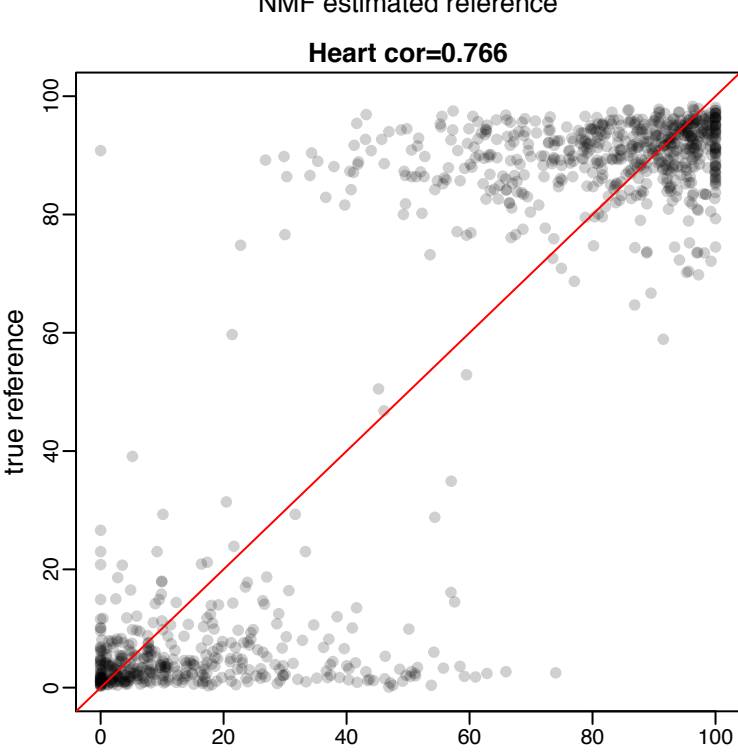

**Neutrophils cor=0.832**

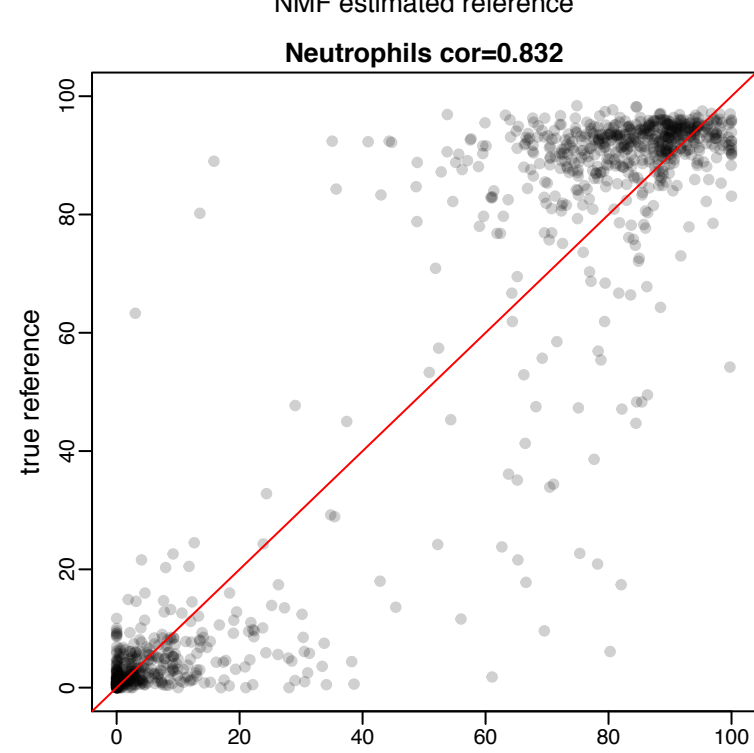

**Placenta cor=0.855**

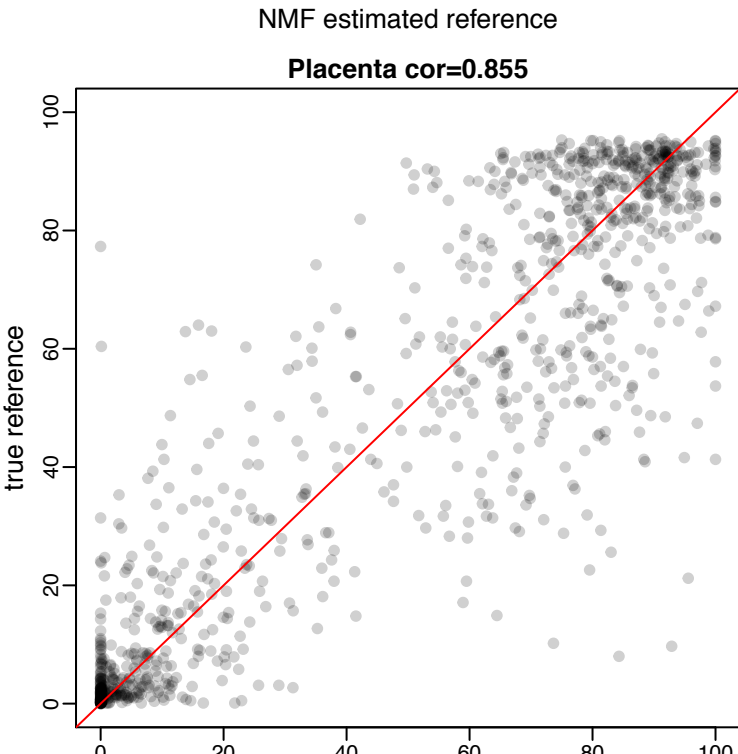

**T cells cor=0.799**

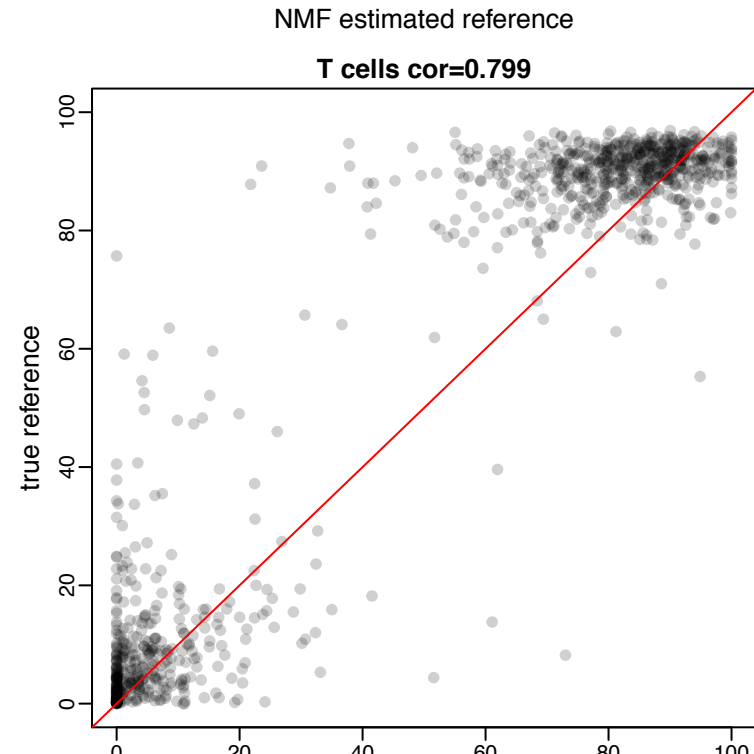

**Esophagus cor=0.774**

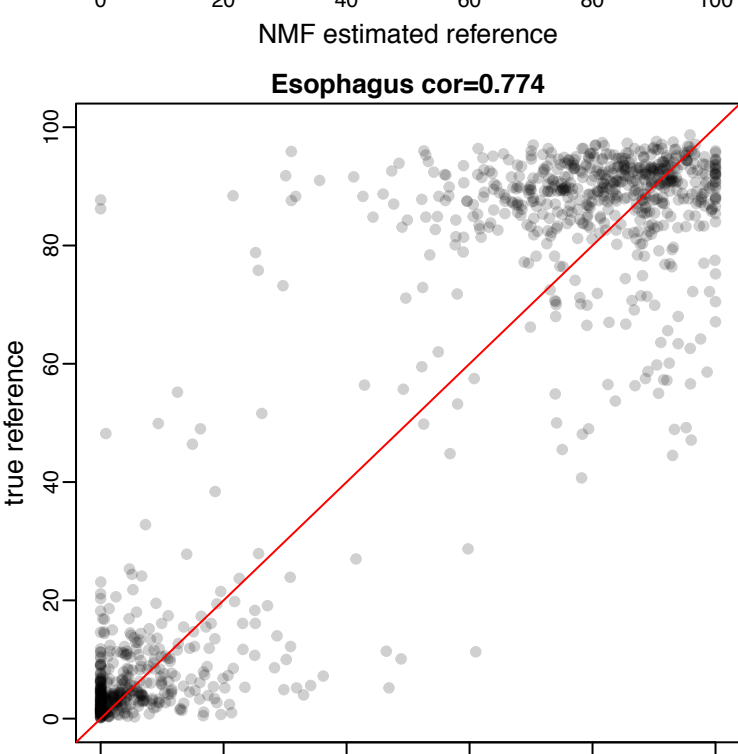

**Adrenal glands cor=0.793**

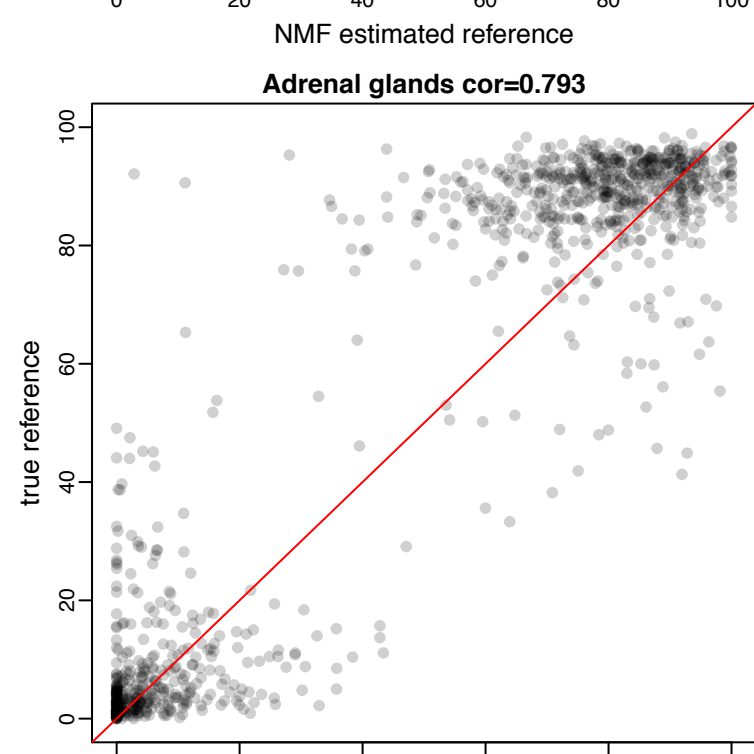

**Pancreas cor=0.764**

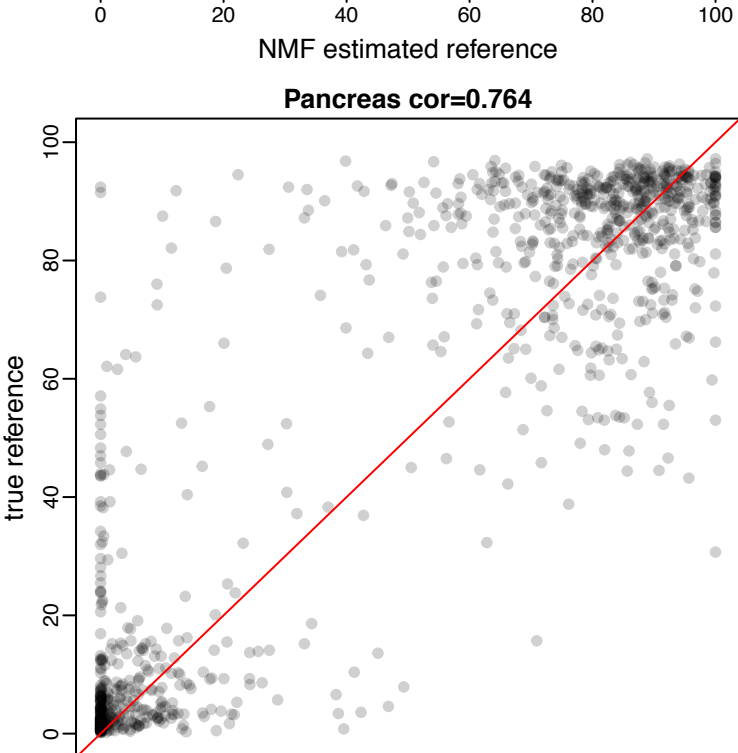

**B cells cor=0.783**

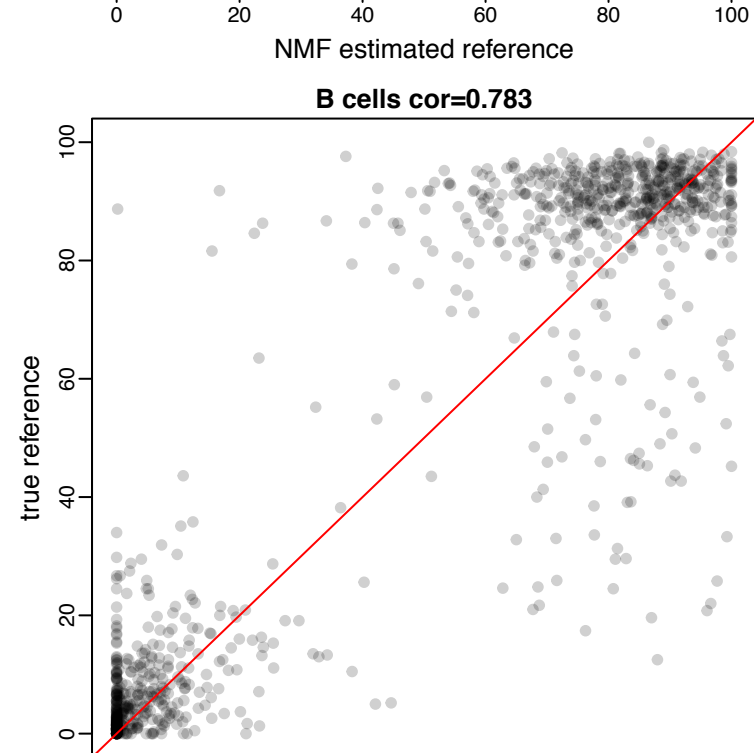

**Colon cor=0.745**

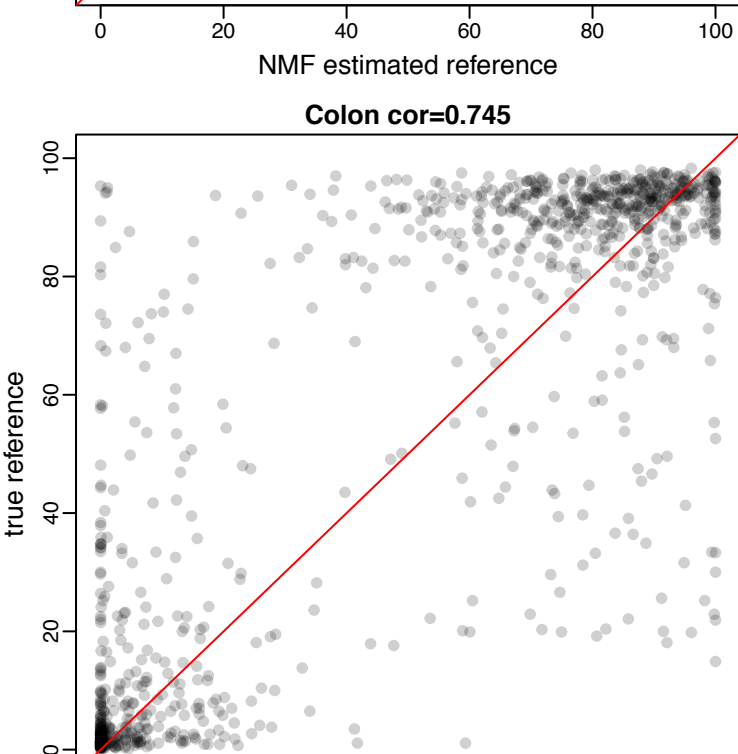

**Brain cor=0.721**

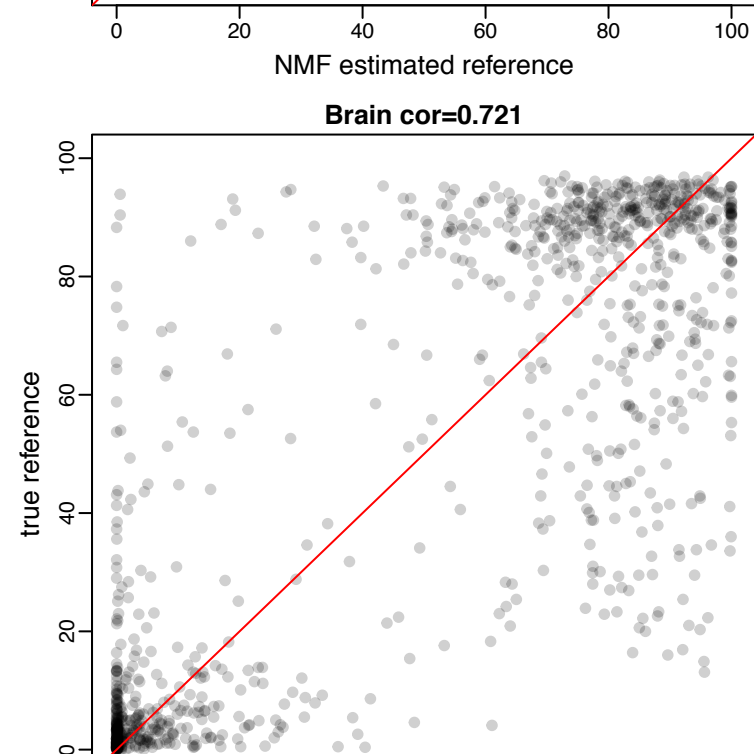

Supplement: bby029_supp.pdf [file bby029_supp.pdf]
